# Supplementary material for: Safety and efficacy of peptide receptor radionuclide therapy with 177Lu-DOTA-EB-TATE in patients with metastatic neuroendocrine tumors
Source: PubMed Central journal article supplement (PMC9516233; doi:10.7150/thno.77219), 2022-09-06
Supplement: thnov12p6437s1.pdf [file thnov12p6437s1.pdf]

**Table S1.** Demographic and baseline clinical characteristics of patients

| Patient | Age<br>(years) | Gender | Primary site              | Grade<br>(Ki-67 index) | Previous treatment                                                | Number of<br>PRRT cycles |
|---------|----------------|--------|---------------------------|------------------------|-------------------------------------------------------------------|--------------------------|
| 1       | 66             | M      | Paraganglioma             | G2 (5%)                | SSA, surgery, TACE, PRRT                                          | 3                        |
| 2       | 39             | F      | Duodenum                  | G2 (5%)                | SSA                                                               | 2                        |
| 3       | 55             | M      | Rectum                    | G2 (15%)               | Surgery, SSA                                                      | 2                        |
| 4       | 15             | F      | Pancreas                  | G2 (5%)                | Surgery, SSA                                                      | 1                        |
| 5       | 49             | M      | Pancreas                  | G2 (5%)                | SSA, chemotherapy                                                 | 3                        |
| 6       | 41             | F      | Pancreas                  | G2 (15%)               | Surgery, SSA                                                      | 3                        |
| 7       | 34             | M      | Pancreas                  | G2 (10%)               | Surgery, SSA, chemotherapy, everolimus, tyrosine kinase inhibitor | 3                        |
| 8       | 39             | M      | Pancreas                  | G2 (3%)                | SSA, TACE, PRRT                                                   | 2                        |
| 9       | 60             | M      | Rectum                    | G2 (9%)                | SSA                                                               | 2                        |
| 10      | 57             | F      | Pancreas                  | G2 (5%)                | Surgery, SSA, everolimus                                          | 2                        |
| 11      | 43             | M      | Pancreas                  | G2 (10%)               | SSA, chemotherapy, tyrosine kinase inhibitor                      | 2                        |
| 12      | 60             | M      | Pancreas                  | G2 (3%)                | SSA, chemotherapy, tyrosine kinase inhibitor                      | 2                        |
| 13      | 55             | F      | Pancreas                  | G2 (20%)               | Surgery, SSA, PRRT                                                | 2                        |
| 14      | 51             | F      | Pancreas                  | G2 (5%)                | Surgery, SSA, PRRT                                                | 1                        |
| 15      | 64             | M      | Rectum                    | G2 (8%)                | Surgery, SSA, everolimus                                          | 3                        |
| 16      | 69             | M      | Pancreas                  | G3 (30%)               | Surgery, chemotherapy, tyrosine kinase inhibitor                  | 1                        |
| 17      | 45             | M      | Pancreas                  | G2 (15%)               | Surgery, radiotherapy, TACE, SSA, chemotherapy                    | 3                        |
| 18      | 48             | M      | Duodenum                  | G1 (1%)                | Surgery, tyrosine kinase inhibitor,                               | 3                        |
| 19      | 56             | F      | Pancreas                  | G3 (25%)               | Chemotherapy                                                      | 3                        |
| 20      | 59             | M      | Rectum                    | G2 (15%)               | Surgery, chemotherapy                                             | 2                        |
| 21      | 46             | F      | Duodenum                  | G2 (18%)               | Surgery, SSA                                                      | 3                        |
| 22      | 34             | M      | Duodenum                  | G2 (10%)               | TACE, chemotherapy                                                | 3                        |
| 23      | 63             | M      | Pancreas                  | G2 (5%)                | Tyrosine kinase inhibitor                                         | 1                        |
| 24      | 58             | F      | Pancreas                  | G2 (3%)                | Surgery, SSA                                                      | 2                        |
| 25      | 42             | F      | Pancreas                  | G2 (5%)                | Tyrosine kinase inhibitor                                         | 3                        |
| 26      | 66             | M      | Rectum                    | G2 (5%)                | Tyrosine kinase inhibitor, everolimus                             | 2                        |
| 27      | 42             | F      | Pancreas                  | G1 (<2%)               | Surgery, SSA, tyrosine kinase inhibitor, chemotherapy             | 2                        |
| 28      | 45             | M      | Pancreas                  | G1 (1%)                | Surgery                                                           | 3                        |
| 29      | 56             | F      | Paraganglioma             | G2 (15%)               | Chemotherapy                                                      | 3                        |
| 30      | 48             | F      | Cancer of unknown primary | G1 (2%)                | SSA                                                               | 2                        |

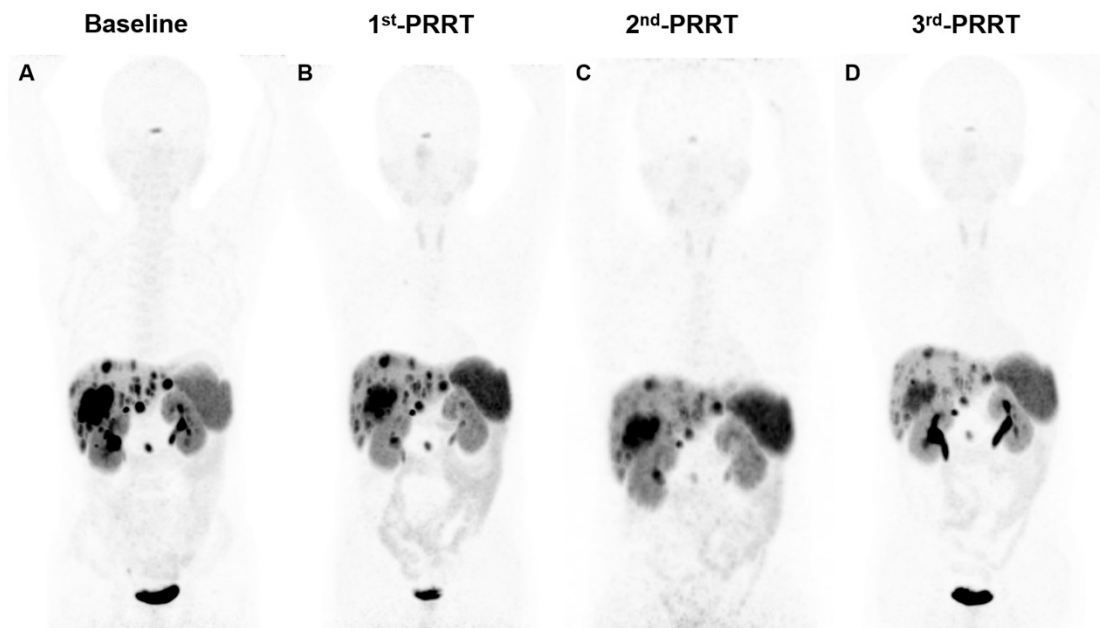

**Figure S1.**  $^{68}\text{Ga}$ -DOTATATE PET/CT images of a representative patient with metastatic pancreatic NET for response evaluation after each cycle of  $^{177}\text{Lu}$ -DOTA-EB-TATE (**A**: baseline  $^{68}\text{Ga}$ -DOTATATE PET/CT image; **B**: restaging after 1 cycle; **C**: restaging after 2 cycles; **D**: restaging after 3 cycles).

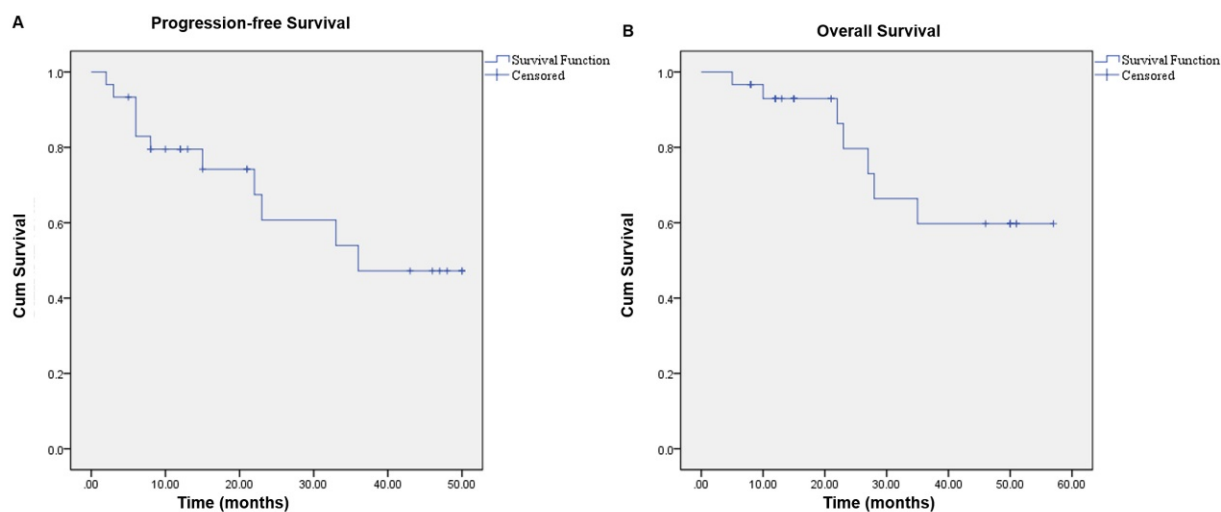

**Figure S2.** Kaplan-Meier curves for progression-free survival (**A**) and overall survival (**B**).

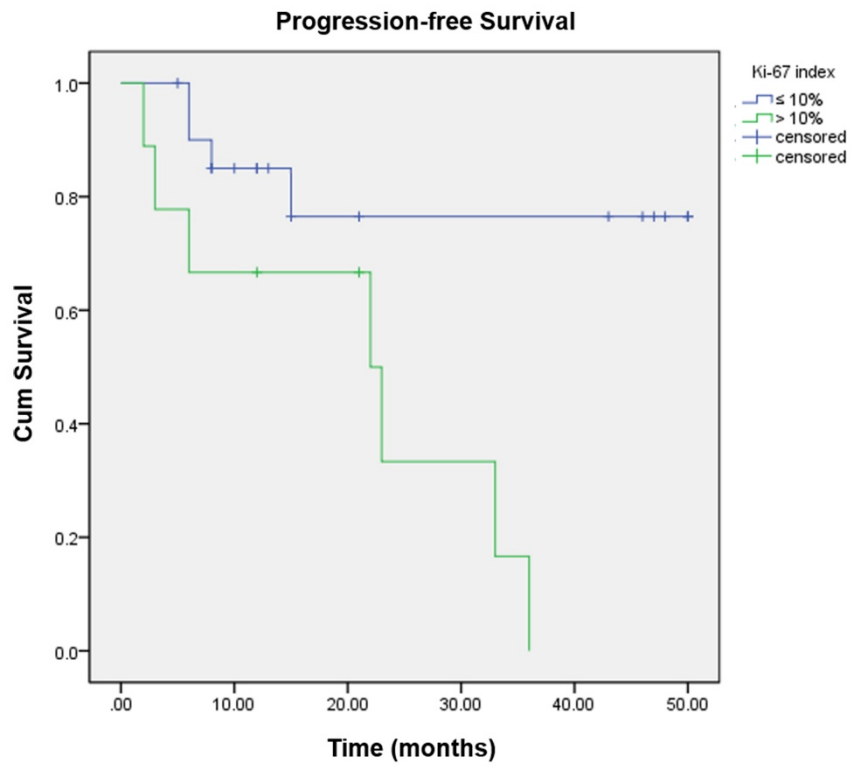

**Figure S3.** Kaplan-Meier curve for progression-free survival stratified by tumor proliferation index (Ki-67 index of  $\leq 10\%$  vs.  $> 10\%$ ).
